# Supplementary material for: Voltammetric Study for the Determination of Diclofenac in Aqueous Solutions Using Electro-Activated Carbon Electrodes
Source: MDPI journal article supplement (doi:10.3390/app12167983), 2022-08-09
Supplement: s1 [file s1]

## SUPPORTING MATERIALS

# Voltammetric Study for the Determination of Diclofenac in Aqueous Solutions Using Electro-Activated Carbon Electrodes

Silvia Berto <sup>1,\*</sup>, Enrico Cagno <sup>1</sup>, Enrico Prenesti <sup>1</sup>, Giulia Aragona <sup>1</sup>, Stefano Bertinetti <sup>1</sup>, Agnese Giacomino <sup>2</sup>, Paolo Inaudi <sup>2</sup>, Mery Malandrino <sup>1</sup>, Emanuele Terranova <sup>1</sup> and Ornella Abollino <sup>2</sup>

<sup>1</sup> Department of Chemistry, University of Turin, via P. Giuria 7, 10125 Turin, Italy

<sup>2</sup> Department of Drug Science and Technology, University of Turin, Via P. Giuria 9, 10125 Turin, Italy

\* Correspondence: [silvia.berto@unito.it](mailto:silvia.berto@unito.it)

### 1. Cyclic Voltammetry

The CV signals were collected on solution of DCF 20  $\mu\text{g L}^{-1}$  at different pH and medium: pH 2, with hydrochloric acid  $1 \times 10^{-2} \text{ mol L}^{-1}$ ; pH 2, with phosphoric acid  $2.5 \times 10^{-2} \text{ mol L}^{-1}$ ; pH 4.7, with acetic buffer  $2.5 \times 10^{-2} \text{ mol L}^{-1}$ ; pH 7, with phosphate buffer  $2.5 \times 10^{-2} \text{ mol L}^{-1}$ . The signals obtained are reported Figure S1.

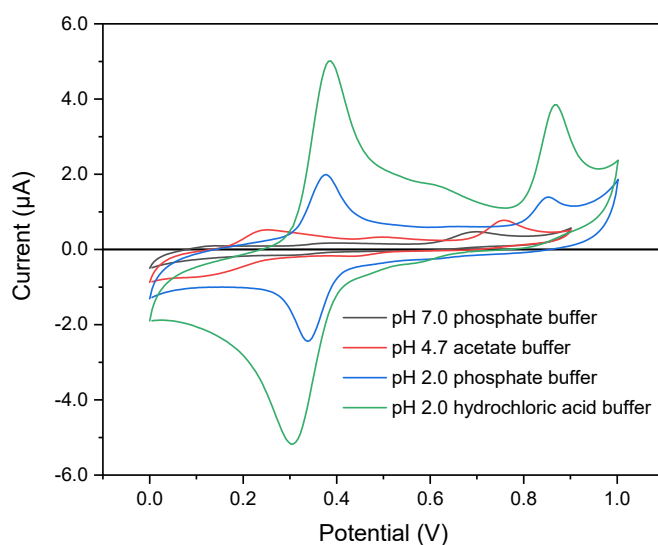

**Figure S1.** CV scans (scan rate 0.05 V/s, 7<sup>th</sup> scan) of DCF 20  $\text{mg L}^{-1}$  as a function of pH and buffer type.

## 2. Design of Experiments outcome

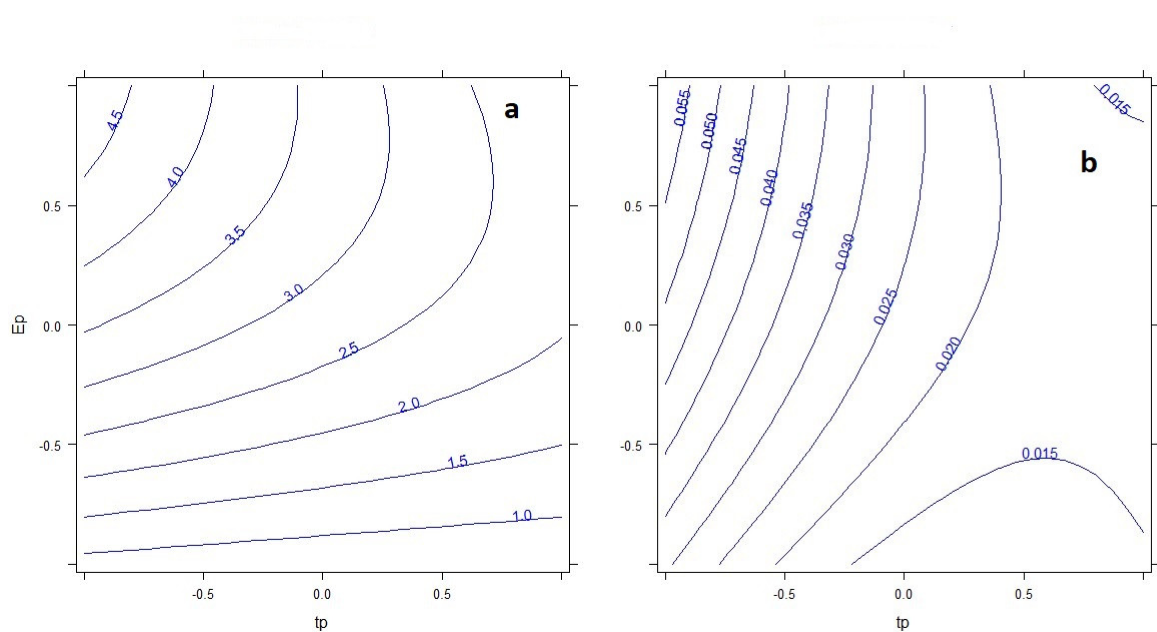

**Figure S2.** Contour plots obtained by the Design of experiments applied to the measurements with aGCE (a) and with aSPCE (b) (SC 25mV s<sup>-1</sup>).  $E_p = E_{\text{pulse}}$ ;  $t_p = t_{\text{pulse}}$ .

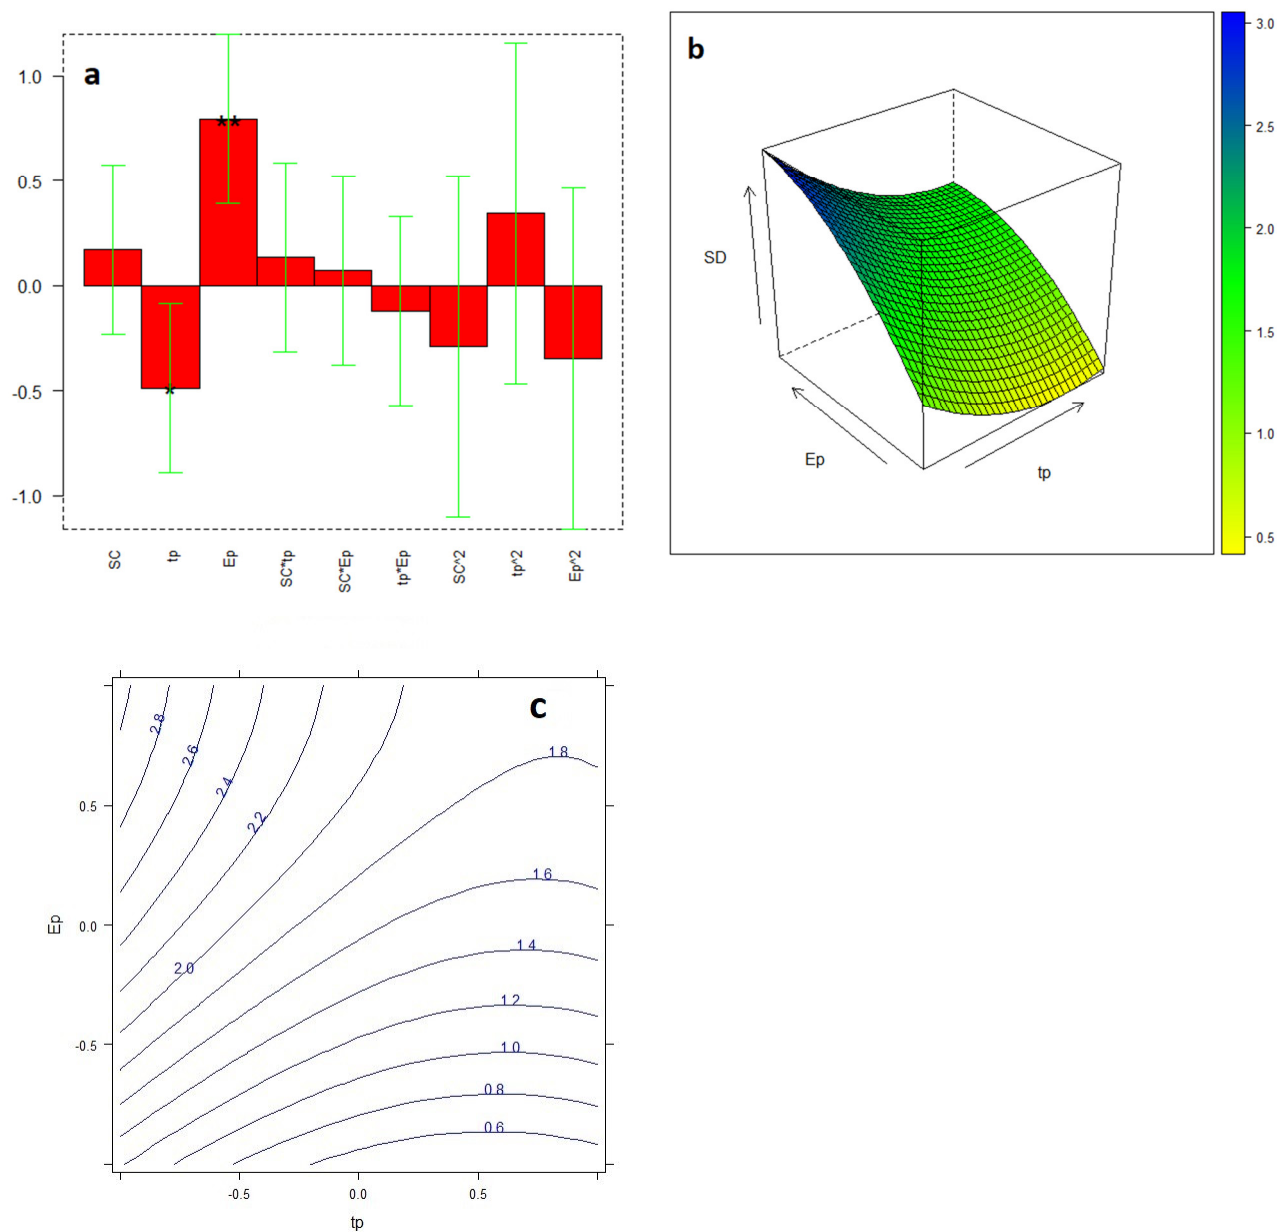

**Figure S3.** Results of the Design of experiments conducted using as response the standard deviation values obtained for the different experiments performed with the aGCE: **(a)** coefficients of the model; **(b)** response surfaces (SC 25mV s<sup>-1</sup>); **(c)** contour plot (SC 25mV s<sup>-1</sup>).  $E_p = E_{pulse}$ ;  $t_p = t_{pulse}$ .

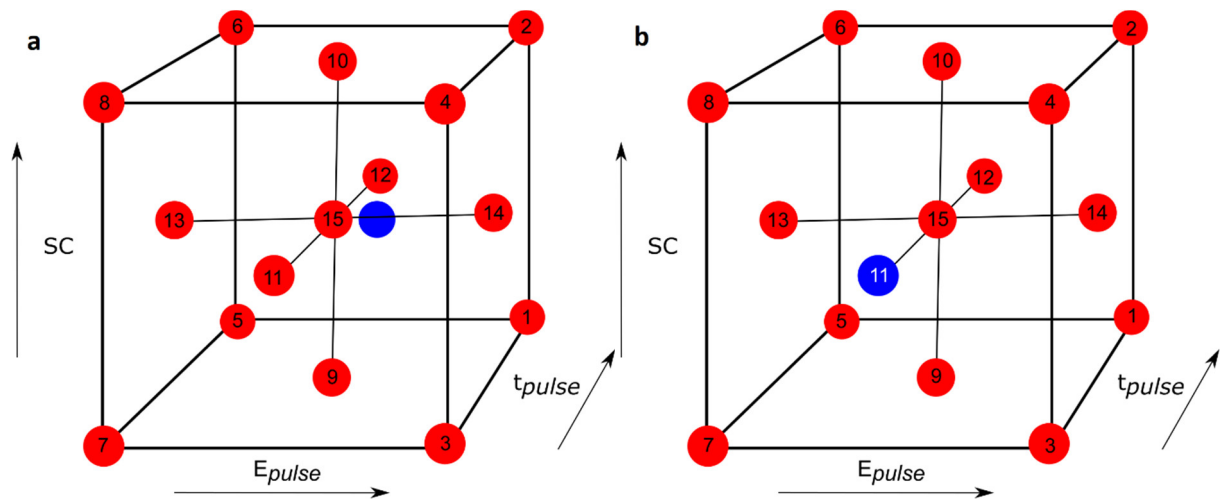

**Figure S4.** Position of the optimized measurement conditions (blue dot) in the experiment space defined by the central composite faced design ((a) aGCE; (b) aSPCE).
